# Supplementary material for: On-plate glycoproteins/glycopeptides selective enrichment and purification based on surface pattern for direct MALDI MS analysis
Source: Royal Society of Chemistry journal article supplement (doi:10.1039/c3an00107e), 2013-01-01
Supplement: c3an00107e.pdf [file c3an00107e.pdf]

1 **Supporting Information**

2 **On-plate Glycoproteins/Glycopeptides Selective Enrichment and Purification Based on**  
3 **Surface Pattern for Direct MALDI MS Analysis**

4 *Zhoufang Zeng,<sup>a</sup> Yandong Wang,<sup>b</sup> Xinhua Guo<sup>a,\*</sup> Ling Wang<sup>c</sup> and Nan Lu<sup>a,b,\*</sup>*

5 a College of Chemistry, Jilin University, Changchun 130012, China

6 b State Key Laboratory of Supramolecular Structure and Materials, College of Chemistry, Jilin  
7 University, Changchun 130012, China

8 c State Key Laboratory of Theoretical and Computational Chemistry, Jilin University, Changchun  
9 130023, China

10

11 \* Corresponding author.

12 Dr. Xinhua Guo

13 Address: 2699 Qianjin Street, Changchun 130012, China

14 Tell Phone: 86-431-85166389

15 Fax: 86-431-85166389

16 Email: guoxh@jlu.edu.cn

17

18 Prof. Nan Lu

19 Address: 2699 Qianjin Street, Changchun 130012, China

20 Tell Phone: 86-431-85168477

21 Fax: 86-431-85168477

22 Email: luenan@jlu.edu.cn

23

24

25

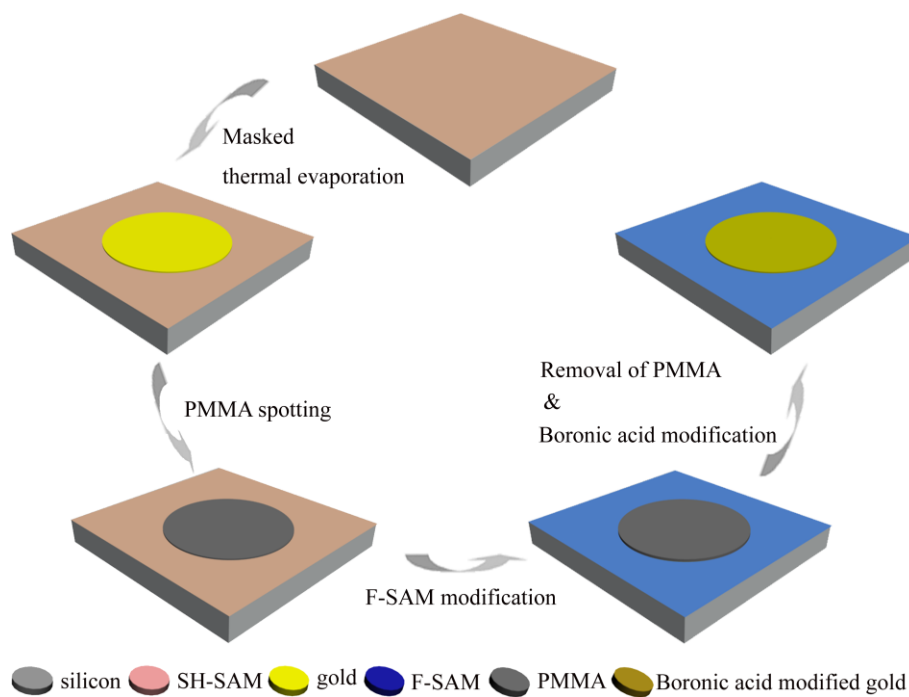

1

2

**Figure S1.** Schematic illustration for the preparation of the boronic acid-modified gold microspot.

3

4

5

6

7

8

9

10

11

12

13

14

15

16

17

18

19

20

21

22

23

24

25

26

27

28

29

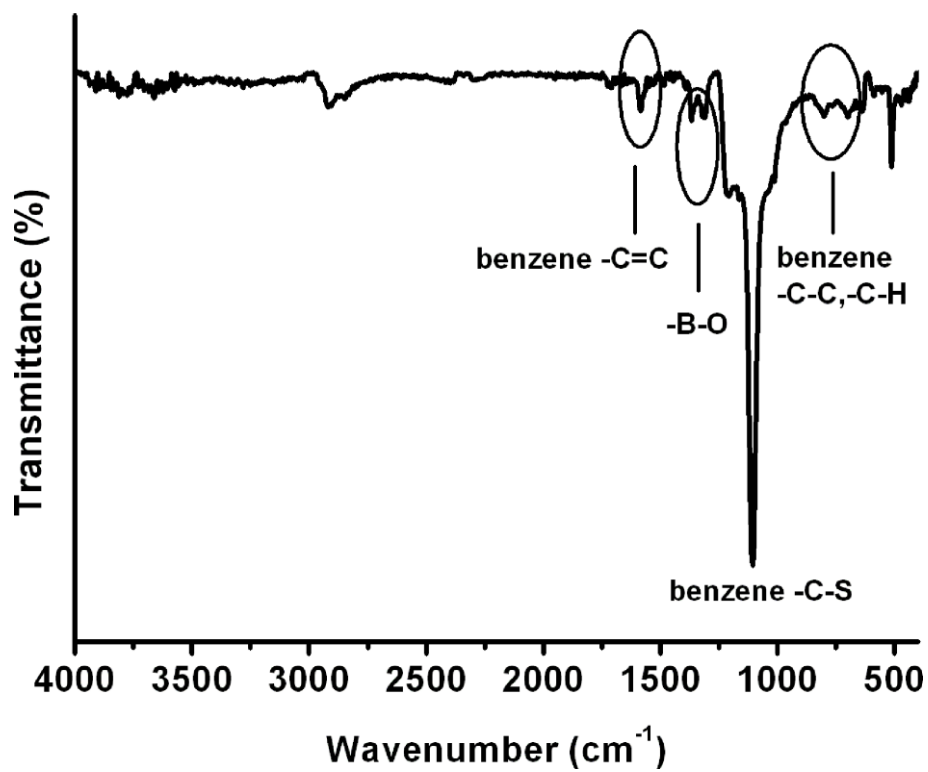

1  
2  
3  
4  
5  
6  
7  
8  
9  
10  
11  
12  
13  
14  
15  
16  
17  
18  
19  
20  
21  
22  
23  
24  
25  
26  
27  
28  
29

**Figure S2.** FT-IR spectrum of 4-mercaptophenylboronic acid modified gold.

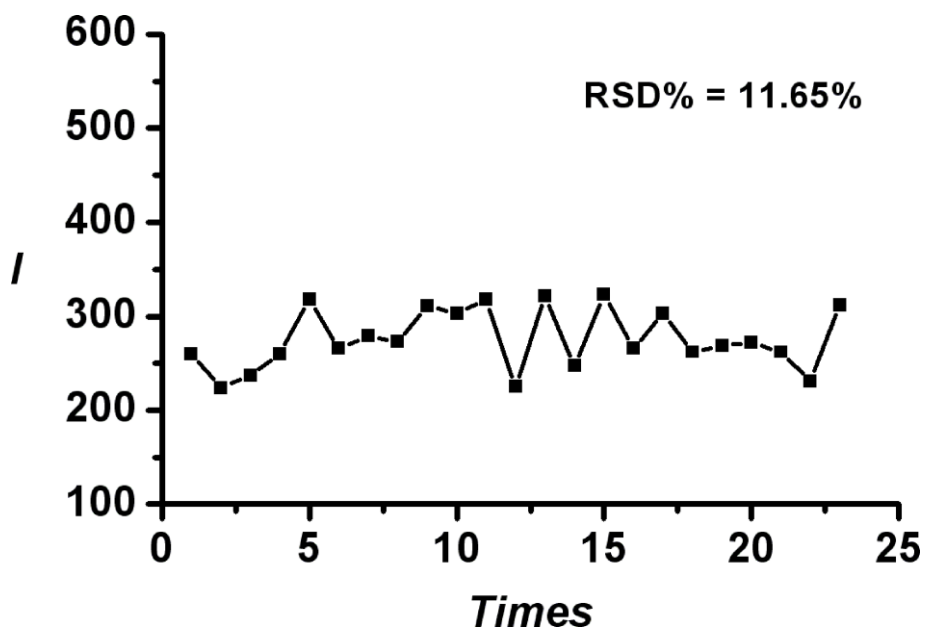

1

2 **Figure S3.** The spot-to-spot reproducibility of HRP protein ( $50 \text{ fmol } \mu\text{L}^{-1}$ ) with the surface patterned

3 sample support.

4

5

6

7

8

9

10

11

12

13

14

15

16

17

18

19

20

21

22

23

24

25

26

27

28

29

30

31

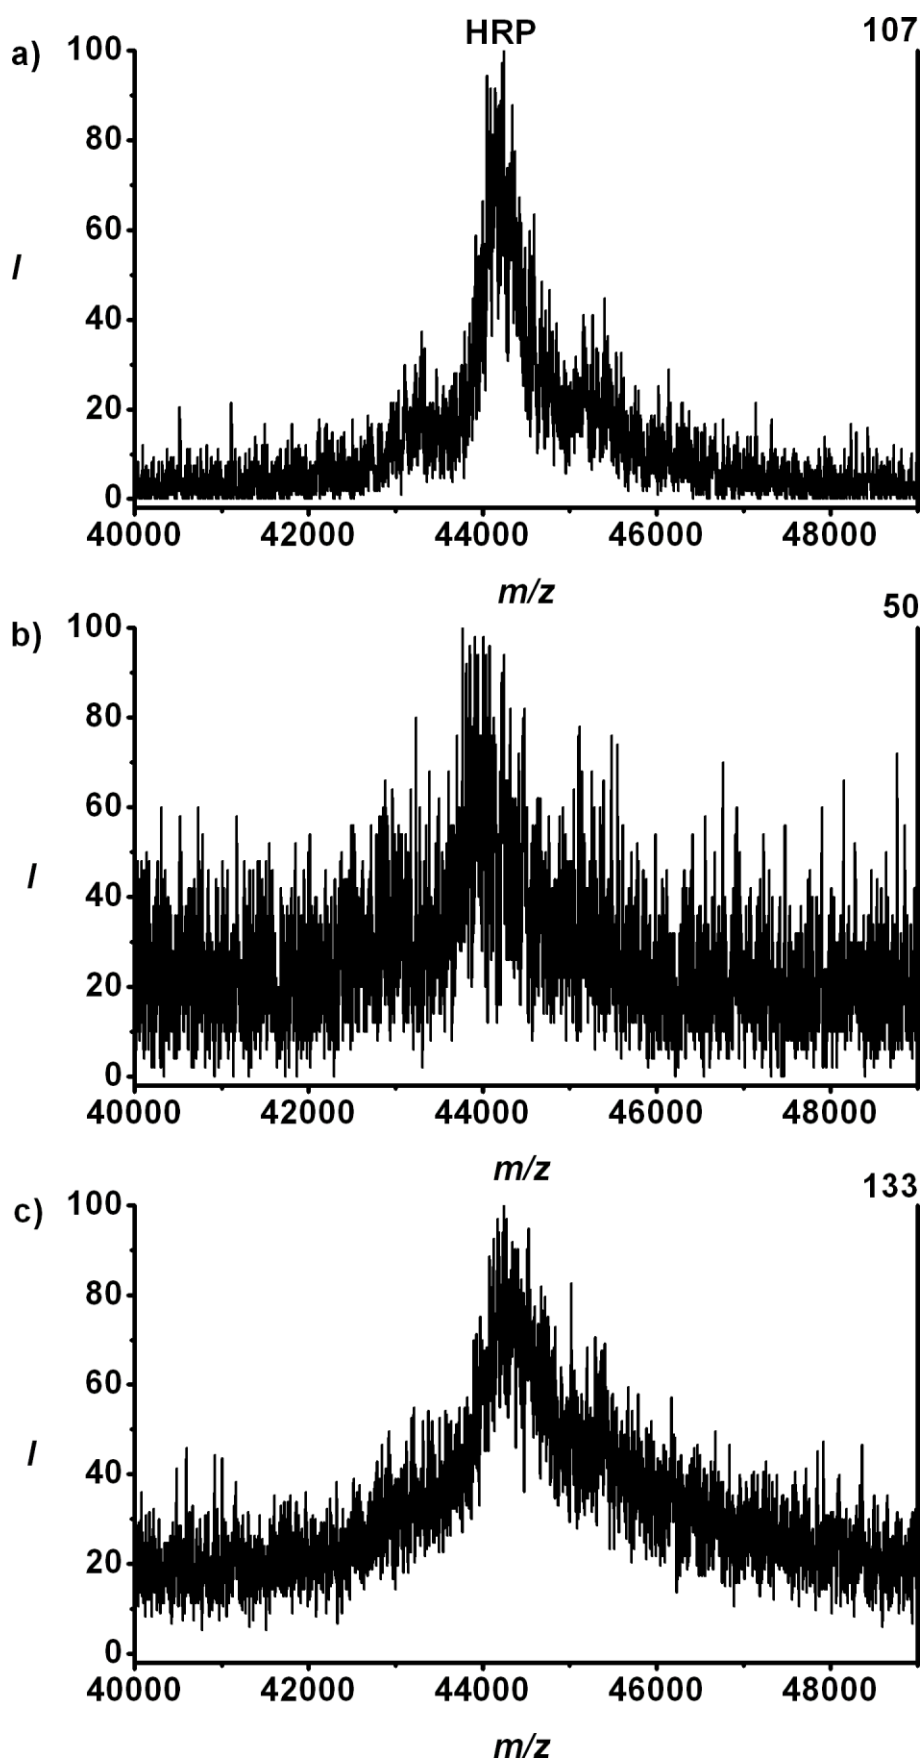

1

2 **Figure S4.** The limit of detection of HRP protein: a) 50  $\text{fmol } \mu\text{L}^{-1}$ , with the stainless steel MALDI

3 plate; b) 25  $\text{fmol } \mu\text{L}^{-1}$ , with the phenylboronic acid monolayers; c) 5  $\text{fmol } \mu\text{L}^{-1}$ , with the surface

4 patterned sample support.

1

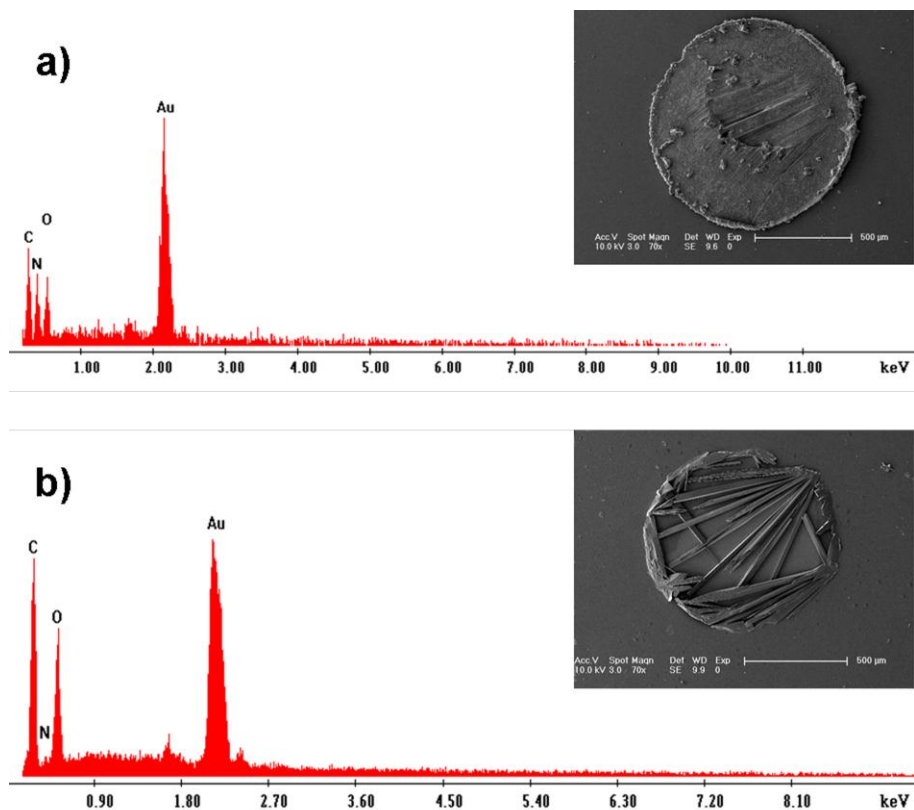

2

3

4 **Figure S5.** EDX/SEM images of salt-containing sample (urea 1M) prepared on the surface patterned  
5 sample support: a) the salts-containing sample is dried in air; b) the salts are removed and  
6 analyte-matrix co-crystallizations are formed. Table S-1: Glycopeptides detected in the HRP protein  
7 digests solution by using the surface patterned sample support and the stainless steel MALDI plate.

8

9

10

11

12

13

14

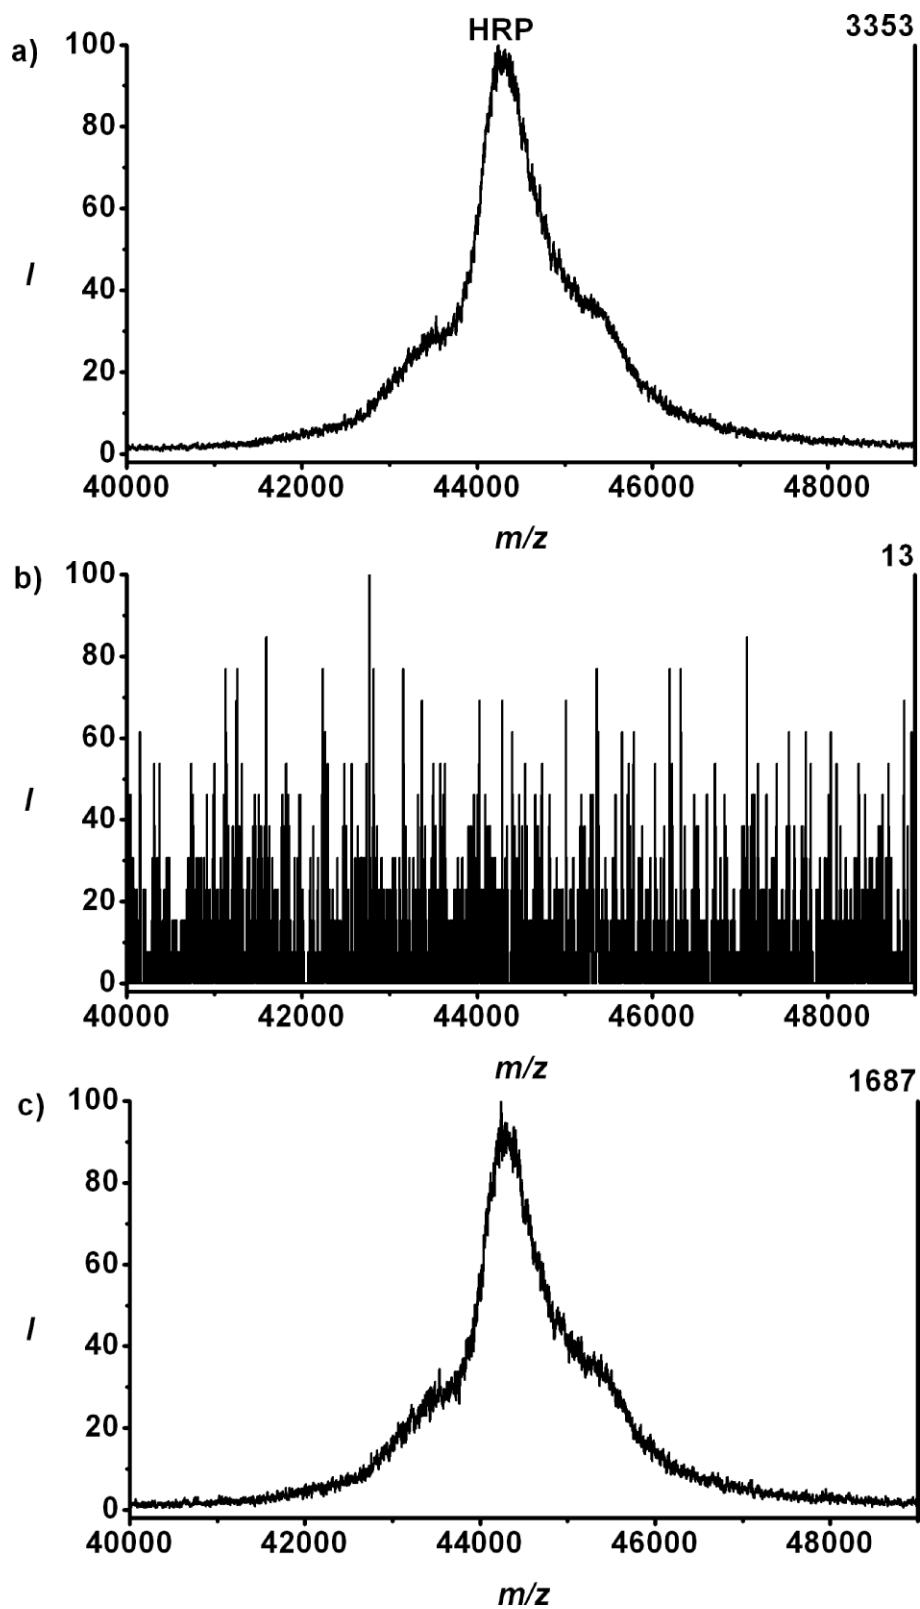

1

2 **Figure S6.** Mass spectra for the reuse of the boronic acid-modified gold microspots: a) first use; b)  
3 regeneration with 5 % TFA and 20 % ACN after first use; c) second use. The sample enrichment  
4 steps are carried out using HRP at the concentration of 500 fmol  $\mu\text{L}^{-1}$ .

5

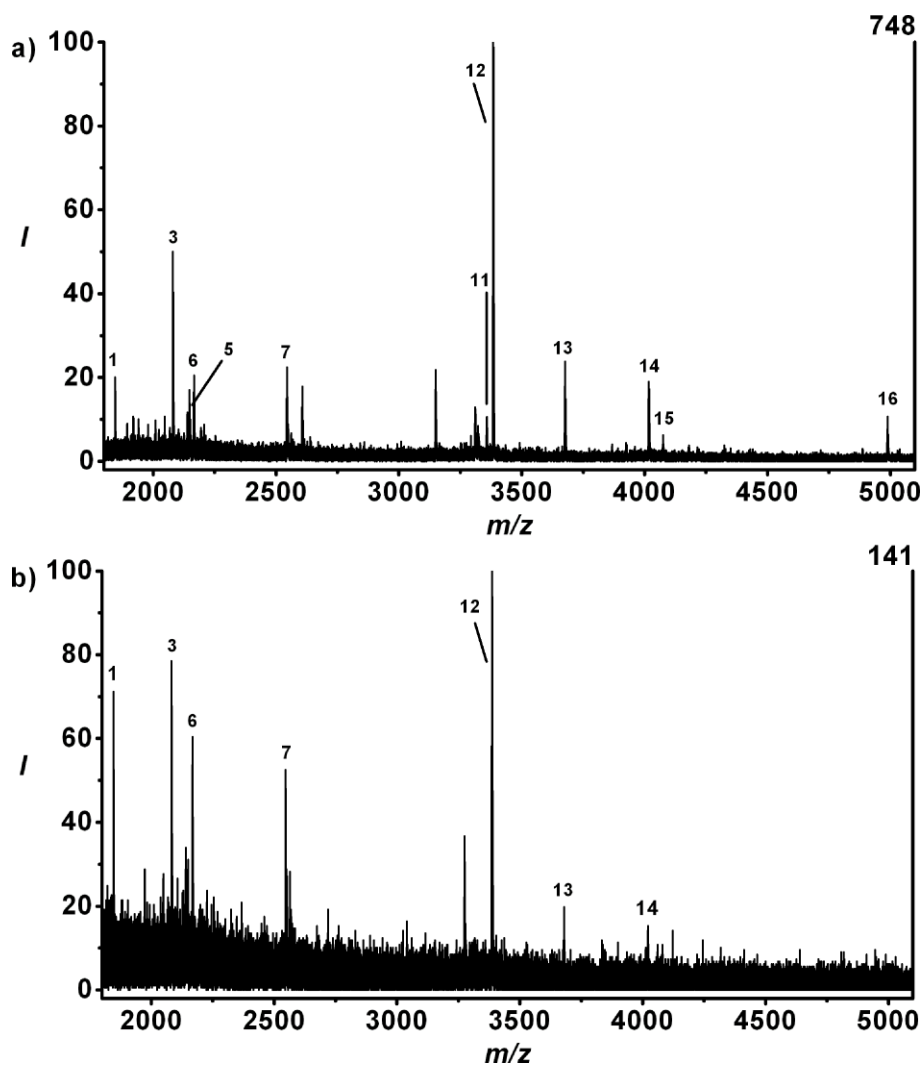

1

2 **Figure S7.** Mass spectra of HRP digests ( $230 \text{ fmol } \mu\text{L}^{-1}$ ) and BSA digests mixture after enrichment

3 and desalting on the surface patterned sample support: a) at the mol ratio of 1:1, b) at the mol ratio of

4 1:10.

5

6

7

8

9

10

11

12



1 **Table S1.** Glycopeptides detected in the HRP protein digest solution by using the stainless steel  
 2 MALDI plate, the phenylboronic acid monolayers and the surface patterned sample support.

| Peak number | Observed m/z | Glycan composition                                                                         | Amino acid sequence <sup>[a]</sup> | A | B | C |
|-------------|--------------|--------------------------------------------------------------------------------------------|------------------------------------|---|---|---|
| 1           | 1845         | Man <sub>3</sub> GlcNAc <sub>2</sub> FucXyl                                                | NVGLN#R                            |   | + |   |
| 2           | 2068         | Man <sub>3</sub> GlcNAc <sub>2</sub> FucXyl                                                | PN#VSNIVR                          |   | + |   |
| 3           | 2081         | Man <sub>3</sub> GlcNAc <sub>2</sub>                                                       | MGN#ITPLTGTQG                      | + | + | + |
| 4           | 2139         | Man <sub>2</sub> GlcNAc <sub>2</sub> FucXyl                                                | LYN#FSN#TGLP                       |   | + | + |
| 5           | 2149         | Man <sub>3</sub> GlcNAc <sub>2</sub> Xyl                                                   | LYN#FSN#TGLP                       |   | + | + |
| 6           | 2164         | Man <sub>3</sub> GlcNAc <sub>2</sub> Fuc                                                   | LYN#FSN#TGLP                       |   | + | + |
| 7           | 2543         | Man <sub>3</sub> GlcNAc <sub>2</sub> FucXyl                                                | SSPN#ATDTIPLVR                     |   | + |   |
| 8           | 2612         | Man <sub>3</sub> GlcNAc <sub>2</sub> Xyl                                                   | MGN#ITPLTGTQGQIR                   |   | + |   |
| 9           | 3275         | Man <sub>3</sub> GlcNAc <sub>2</sub> FucXyl                                                | SC(AAVESACPR)PN#VSNIVR             |   | + | + |
| 10          | 3323         | Man <sub>3</sub> GlcNAc <sub>2</sub> FucXyl                                                | QLTPTFYDN SCPN#VSNIVR              |   | + | + |
| 11          | 3355         | Man <sub>3</sub> GlcNAc <sub>2</sub> FucXyl                                                | SFAN#STQTFNFV EAMDR                |   | + | + |
| 12          | 3378         | Man <sub>2</sub> GlcNAc <sub>2</sub> Fuc                                                   | GLIQSDQELFSSPN#ATDTIPLVR           | + | + | + |
| 13          | 3673         | Man <sub>3</sub> GlcNAc <sub>2</sub> FucXyl                                                | GLIQSDQELFSSPN#ATDTIPLVR           | + | + | + |
| 14          | 4018         | Man <sub>3</sub> GlcNAc <sub>2</sub> FucXyl<br>GlcNAc                                      | LYN#FSNTGLPDPTLN#TTYLQTLR          |   | + | + |
| 15          | 4076         | Man <sub>3</sub> GlcNAc <sub>2</sub> Xyl                                                   | QLTPTFYDN SC(AAVESACPR)PN#VSNIVR   |   | + | + |
| 16          | 4985         | Man <sub>3</sub> GlcNAc <sub>2</sub> FucXyl<br>Man <sub>3</sub> GlcNAc <sub>2</sub> FucXyl | LYN#FSNTGLPDPTLN#TTYLQTLR          | + | + | + |

3 [a] The N-glycosylation sites are marked with N#. GlcNAc = N-acetylglucosamine, Fuc = fructose,  
 4 Man = mannose, Xyl = xylose. 'A' represents the peptides identified with the stainless steel MALDI  
 5 plate; 'B' represents the peptides identified with the surface patterned sample support, 'C' represents  
 6 the peptides identified with the phenylboronic acid monolayers. '+' represents positive identification.

7
